# Supplementary material for: High Throughput miRNA Screening Identifies miR-574-3p Hyperproductive Effect in CHO Cells
Source: MDPI journal article supplement (doi:10.3390/biom11081125), 2021-07-30
Supplement: s1 [file s1]

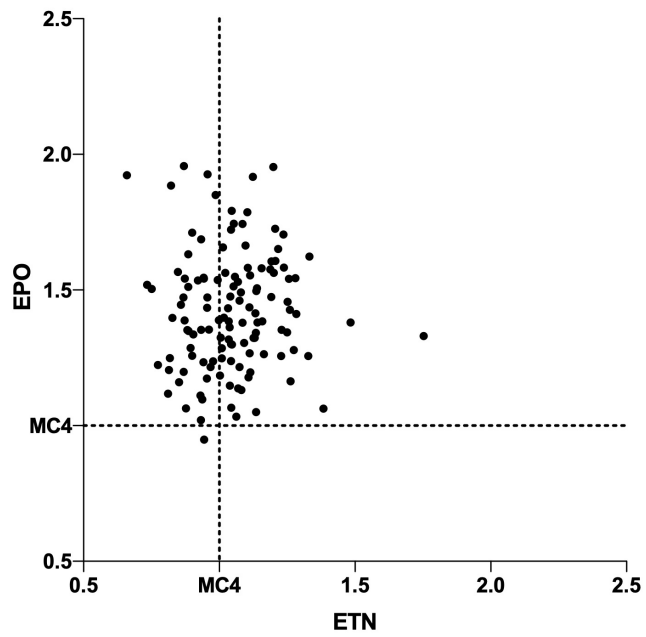

**Supplementary Figure S1:** The effect of 124 miRNA mimics transiently transfected in CHO-EPO and CHO-ETN cells. Normalized volumetric productivities are presented as fold change relative to the respective negative control.

a)

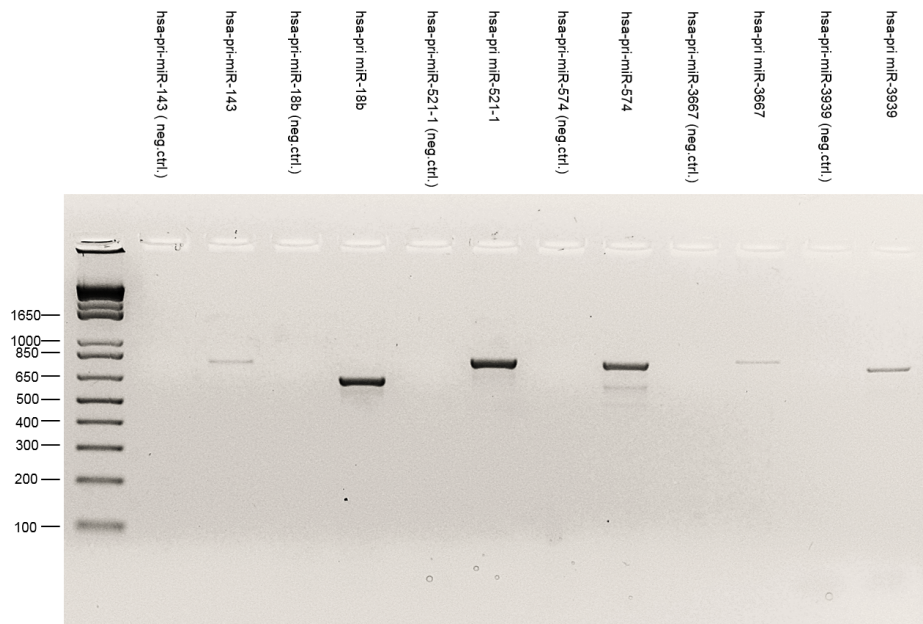

b)

|                |     |                                                     |     |
|----------------|-----|-----------------------------------------------------|-----|
| hsa-pri-mir143 | 11  | CCAGAGCTGGAGAGGT-GGAGCCCAGGTCCCCT-----CTAACACCCC    | 52  |
| cgr-pri-mir143 | 1   | CAAGGGAAGAACAGGTGGGAG-GCAGG-CCACTACACATGCTCACACTCC  | 48  |
| hsa-pri-mir143 | 53  | TTCTCCTGGCCAGGTTGGAGTCCC GCCACAGGCCACAGAGCG---GAGC  | 99  |
| cgr-pri-mir143 | 49  | TTTTCTGCCCCA----GGAAGCCAGCCGAG--CCCCAGTGCGCATGTGC   | 92  |
| hsa-pri-mir143 | 100 | AGCGCAGCGCCCTGTCTCCCAGCCTGAGGTCAGTGTGCATCTCTGGTC    | 149 |
| cgr-pri-mir143 | 93  | -GCGGAGCG-TCTGTCTCCCAGCCTGAGGTCAGTGTGCATCTCTGGTC    | 140 |
| hsa-pri-mir143 | 150 | AGTTGGGAGTCTGAGATGAAGCACTGTAGCTCAGGAAGAGAGAAGTTGTT  | 199 |
| cgr-pri-mir143 | 141 | AGTTGGGAGTCTGAGATGAAGCACTGTAGCTCAGGAAGGAGAGAAGTTGTT | 190 |
| hsa-pri-mir143 | 200 | CTGCAGCCATCAGCCTGGAAGTGGTAAGTGTGGGGGGTTGTGGGGGGCC   | 249 |
| cgr-pri-mir143 | 191 | CTGCAGCCATCA-CCAGGACGTGGTAAGTGT-----GATGTGGGG----   | 230 |
| hsa-pri-mir143 | 250 | ATAACAGG-AAGGACAGAGTGTTCAGACTCCATACTATCAG-CCACTT    | 297 |
| cgr-pri-mir143 | 231 | -TAGCAGGCCCGGATAG---GTT---AGACTCCACTCCAGCAGTCCA-TG  | 272 |
| hsa-pri-mir143 | 298 | GTGAT                                               | 302 |
| cgr-pri-mir143 | 273 | GTGAT                                               | 277 |

**Supplementary Figure S2:** a) PCR analyses of genomic DNA of CHO-ETN stable cells, engineered with human pri-miRNA-143, pri-miRNA-18b, pri-miRNA-521, pri-miRNA-574, pri-miRNA-3667 and pri-miRNA-3939 using forward CMV promoter and reverse pri-miRNAs specific primers, confirm the presence of the human pri-miRNAs b) Sequence alignment of hsa-pri-miR-143 and cgr-pri-miR-143 sequences using EMBOSS WATER software. The mature miRNA sequence is highlighted in grey.

```

          1          10          20 23
          |-----+-----+---|
miR-143-3p TGAGATGAAGCACTGTAGCTC
miR-574-3p CACGCTCATGCACACCCCACA
miR-18b-3p TGCCCTAATGCCCTTC-TGGC
miR-521-1-3p AACGCACTTCCCTTTAGAGTGT
miR-3939-3p TACGCGCAGACCACAGGA-TGTC
miR-132-5p ACCGTGGCTTTCGATTGTTACT
miR-3667-5p AAAGACCCATTGAGGAGAAGGT
Consensus .acgc.ca..cc.....g...tgt.

```

**Supplementary Figure S3:** Multiple sequence alignment of miR-143-3p, miR-18b-3p, miR-132-5p, miR-521-1-3p, miR-574-3p, miR-3667-5p and miR-3939-3p.

| Primer name                            | Sequence                                           |
|----------------------------------------|----------------------------------------------------|
| <i>Hsa-pri-mir-143 fw</i>              | 5'-<br>TATGGATCCAAGGTTTGGTCCTGGGTGCTCAAAT-3'       |
| <i>Hsa-pri-mir-143 rv</i>              | 5'-<br>AAAGAATTCTGCTAACGCCTCATGCTAAGATGG-3'        |
| <i>Hsa-pri-mir-18b fw</i>              | 5'-<br>TATGGATCCCCATGGTGATTTAGTCAATGGCTAC-3'       |
| <i>Hsa-pri-mir-18b rv</i>              | 5'-<br>AAAAAGAATTCAGCACTTTGGTACTACTAGGACCC<br>A-3' |
| <i>Hsa-pri-mir-521-1 fw</i>            | 5'-<br>TATGGATCCTCAGGAGGGTTGCCCTGCATGAA-3'         |
| <i>Hsa-pri-mir-521-1 rv</i>            | 5'-<br>AAAAAGAATTCAGGCAGAAGAATGGCGTGAACCT<br>GG-3' |
| <i>Hsa-pri-mir-574 fw</i>              | 5'-<br>TATGGATCCTACTCGGCCGCCTGAGCGGTAAGA-3'        |
| <i>Hsa-pri-mir-574 rv</i>              | 5'-<br>AAAAAGAATTCTGGGACGAGGCCTCTGTCTTACAG<br>-3'  |
| <i>Hsa-pri-mir-3667 fw</i>             | 5'-TATGGATCCCTTTTGAGATGCTGACTTTCTGTG-<br>3'        |
| <i>Hsa-pri-mir-3667 rv</i>             | 5'-<br>AAAAAGAATTCAGGATGCTTCTACCAATGAGGA-3'        |
| <i>Hsa-pri-mir-3939 fw</i>             | 5'-TATGGATCCCAGGCCTCAGCTTTCAGCTTAA-3'              |
| <i>Hsa-pri-mir-3939 rv</i>             | 5'-<br>AAAAAGAATTCATATGTGTGTACATACCCACAGAC<br>A-3' |
| <i>BLOCKnc-to-miRVec-<br/>BamHI fw</i> | 5'-TTTTTGGATCCTGGAGGCTTGCT-3'                      |

|                                   |                                                    |
|-----------------------------------|----------------------------------------------------|
| <i>BLOCKnc-to-miRVec-EcoRI rv</i> | 5'-TATATAGAATTCTAGATCAACCACTTTGTACAA-<br>'3        |
| <i>Cgr-pri-mir-574 fw</i>         | 5'-TATGGATCCACTCGGCGGCCAAGCGGTAAGAG-<br>3'         |
| <i>Cgr-pri-mir-574 rv</i>         | 5'-<br>AAAAAGAATTCAGGGCTAGGGCAGGCACACTCTA<br>GG-3' |

**Supplementary Table S1.** Primers used to amplify pri-miRNA sequences of *Homo sapiens* (hsa) and *Cricetulus griseus* (cgr)

| Primer name               | Sequence                                                                                                                           |
|---------------------------|------------------------------------------------------------------------------------------------------------------------------------|
| <i>QC-miR-18b-3p fw</i>   | 5'-<br>GTGCGCGGAGCGTCTGTCTCCCAGCCGCCACAAGGGGCATATAGG<br>GCTGGTCAGTTGGGAGTCTGCCCTAAATGCCCTTCTGGCGGAAG<br>GGAGAAGTTGTTCTGCAGCCA-'3   |
| <i>QC-miR-18b-3p rv</i>   | 5'-<br>TGGCTGCAGAACAACCTTCTCCCTTCCGCCAGAAGGGGCATTTAGG<br>GCAGACTCCCAACTGACCAGCCCTATATGCCCTTGTGGCGGCTG<br>GGAGACAGACGCTCCGCGCAC-'3  |
| <i>QC-miR-132-5p fw</i>   | 5'-<br>GTGCGCGGAGCGTCTGTCTCCCAGCCAGTATCAATCGAAACCCAC<br>GGAGGTCAGTTGGGAGTCACCGTGGCTTTCGATTGTTACTGGAAG<br>GGAGAAGTTGTTCTGCAGCCA-'3  |
| <i>QC-miR-132-5p rv</i>   | 5'-<br>TGGCTGCAGAACAACCTTCTCCCTTCCAGTAACAATCGAAAGCCAC<br>GGTGACTCCCAACTGACCTCCGTGGGTTTCGATTGATACTGGCTG<br>GGAGACAGACGCTCCGCGCAC-'3 |
| <i>QC-miR-521-1-3p fw</i> | 5'-<br>GTGCGCGGAGCGTCTGTCTCCCAGCCACACACTAAAGGGATGTGC<br>GTAGGTCAGTTGGGAGTCAACGCACTTCCCTTTAGAGTGTGGAAG<br>GGAGAAGTTGTTCTGCAGCCA-'3  |
| <i>QC-miR-521-1-3p rv</i> | 5'-<br>TGGCTGCAGAACAACCTTCTCCCTTCCACACTCTAAAGGGAAGTGC<br>GTTGACTCCCAACTGACCTACGCACATCCCTTTAGTGTGTGGCTGG<br>GAGACAGACGCTCCGCGCAC-'3 |
| <i>QC-miR-574-3p fw</i>   | 5'-<br>GTGCGCGGAGCGTCTGTCTCCCAGCCTGTGCGTGTGTGCAAGAGC<br>GTCGGTCAGTTGGGAGTCCACGCTCATGCACACACCCACAGGAAG<br>GGAGAAGTTGTTCTGCAGCCA-'3  |
| <i>QC-miR-</i>            | 5'-<br>TGGCTGCAGAACAACCTTCTCCCTTCCCTGTGGGTGTGTGCATGAGC                                                                             |

|                          |                                                                                                                                      |
|--------------------------|--------------------------------------------------------------------------------------------------------------------------------------|
| <i>574-3p rv</i>         | GTGGACTCCCAACTGACCGACGCTCTTGCACACACGCACAGGCTG<br>GGAGACAGACGCTCCGCGCAC-‘3                                                            |
| <i>QC-miR-3667-5p fw</i> | 5’-<br>GTGCGCGGAGCGTCTGTCTCCCAGCCAAAGACCCATTGAGGAGAA<br>GGTGGTCAGTTGGGAGTCACCTTCCTCTCCATGGGTCTTTGGAAG<br>GGAGAAGTTGTTCTGCAGCCA-‘3    |
| <i>QC-miR-3667-5p rv</i> | 5’-<br>TGGCTGCAGAACAACCTTCTCCCTTCCAAAGACCCATGGAGAGGAA<br>GGTGACTCCCAACTGACCACCTTCTCCTCAATGGGTCTTTGGCTGG<br>GAGACAGACGCTCCGCGCAC-‘3   |
| <i>QC-miR-3939-3p fw</i> | 5’-<br>GTGCGCGGAGCGTCTGTCTCCCAGCCGACAACCTGTGGTTCAGCGC<br>GTTGGTTCAGTTGGGAGTCTACGCGCAGACCACAGGATGTTCGGAAG<br>GGAGAAGTTGTTCTGCAGCCA-‘3 |
| <i>QC-miR-3939-3p rv</i> | 5’-<br>TGGCTGCAGAACAACCTTCTCCCTTCCGACATCCTGTGGTCTGCGCG<br>TAGACTCCCAACTGACCAACGCGCTGACCACAGGTTGTTCGGCTGG<br>GAGACAGACGCTCCGCGCAC-‘3  |

**Supplementary Table S2.** Primers for site-directed mutagenesis

| <b>Primer name</b>            | <b>Sequence</b>               |
|-------------------------------|-------------------------------|
| <i>CLTC(Clathrin)-qPCR fw</i> | 5’-CGCTTGGCATCTACCCTTGTTTC-3’ |
| <i>CLTC(Clathrin)-qPCR rv</i> | 5’-AGCAGACCTCCTTCCATGTTTCG-3’ |
| <i>CUL2-qPCR fw</i>           | 5’-TCAGCAGCGTATGGTAGCAGAC-3’  |
| <i>CUL2-qPCR rv</i>           | 5’-TGGACACAGCACGGAGCAAG-3’    |
| <i>RAC1-qPCR fw</i>           | 5’-TGTCCCAACACTCCCATCATCC-3’  |
| <i>RAC1-qPCR rv</i>           | 5’-CGCTGAGCACTCCAGGTATTTG-3’  |
| <i>RXRA-qPCR fw</i>           | 5’-CTACGGGCAGGCTGGAATGAG-3’   |
| <i>RXRA-qPCR rv</i>           | 5’-GCTATGGAACGGTGGGAGAAGG-3’  |
| <i>Bcl2l1(BclXl)-qPCR fw</i>  | 5’-TGACTGTGGCTGGTGTGGTTC-3’   |
| <i>Bcl2l1(BclXl)-qPCR rv</i>  | 5’-GGAGGCGAGATGTGAGTAGGTG-3’  |
| <i>p300-qPCR fw</i>           | 5’-CAGACACCAACACCACCAACAC-3’  |
| <i>p300-qPCR rv</i>           | 5’-GCAGGAGCAGCAGGAATTGAAG-3’  |
| <i>SMAD4-qPCR fw</i>          | 5’-CTGGACGAGCACCTGGAGAC-3’    |
| <i>SMAD4-qPCR rv</i>          | 5’-ACACTGCCGCAAATCAAAGACC-3’  |
| <i>TGFBI-qPCR fw</i>          | 5’-ACGGAGAAGAACTGCTGTGTGC-3’  |
| <i>TGFBI-qPCR rv</i>          | 5’-GTTGGTTGTAGAGGGCGAGGAC-3’  |
| <i>ERH-qPCR fw</i>            | 5’-GCAGGACTTACGCTGACTATG-3’   |
| <i>ERH-qPCR rv</i>            | 5’-GCTGTTGGGATTCATTCTCTTC-3’  |
| <i>MMADHC-qPCR fw</i>         | 5’-TGTCACCTCAATGGGACTGC-3’    |
| <i>MMADHC-qPCR rv</i>         | 5’-CAGGTGCATCACTACTCTGAAAC-3’ |
| <i>GAPDH-qPCR fw</i>          | 5’-GAAAGCTGTGGCGTGATGG-3’     |
| <i>GAPDH-qPCR rv</i>          | 5’-TACTTGGCAGGTTTCTCCAG-3’    |

|                    |                             |
|--------------------|-----------------------------|
| <i>EPO-qPCR fw</i> | 5'-TGTGGATAAAGCCGTCAGTG-3'  |
| <i>EPO-qPCR rv</i> | 5'-GTGTCAGCAGTGATTGTTCG-3'  |
| <i>ETN-qPCR fw</i> | 5'-CGTGGAGTGGGAATCTAATGG-3' |
| <i>ETN-qPCR rv</i> | 5'-GTGACAGTGACAGGCTCTTC-3'  |

**Supplementary Table S3.** Primers used for qPCRs

| <b>Primer name</b>       | <b>Sequence</b>               |
|--------------------------|-------------------------------|
| <i>pre-miRNA-18b fw</i>  | 5'-TGCCAGAAGGGGCATTTAGG-3'    |
| <i>pre-miRNA-18b rv</i>  | 5'-TGTGTTAAGGTGCATCTAGTGC-3'  |
| <i>pre-miRNA 3667 fw</i> | 5'-AAAGACCCATGGAGAGGAAG-3'    |
| <i>pre-miRNA 3667 rv</i> | 5'-CTTATCTAGCTTCTCTGAGGAT -3' |
| <i>pre-miRNA 3939 fw</i> | 5'-AAGCCAGTGTGGACATCCTG-3'    |
| <i>pre-miRNA 3939 rv</i> | 5'-GCTTCCAAAGGCCTCTGTG-3'     |

**Supplementary Table S4.** Primers used for detection of primary miRNA transcripts

| <b>Primer name</b> | <b>Sequence</b>                  |
|--------------------|----------------------------------|
| <i>p300 siRNA</i>  | 5'- [UUGGACUACCCUAUCAAGUAA]TT-3' |
|                    | 5'- [UUACUUGAUAGGGUAGUCCAA]TT-3' |
| <i>SMAD4 siRNA</i> | 5'- [GGUGGAGAAAGUGAAACGU]TT-3'   |
|                    | 5'- [ACGUUUCACUUUCUCCACC]TT-3'   |

**Supplementary Table S5.** Oligonucleotides for siRNA generation (siRNAs)
